# Supplementary material for: Risk factors for mortality in patients with COVID-19 needing extracorporeal respiratory support
Source: PubMed Central journal article supplement — Eur Respir J. 2022 Feb 10;59(2):2102463. doi: 10.1183/13993003.02463-2021 (PMC8620104; doi:10.1183/13993003.02463-2021), 2022-02-10
Supplement: ERJ-02463-2021.Shareable.pdf [file ERJ-02463-2021.Shareable.pdf]

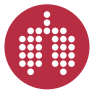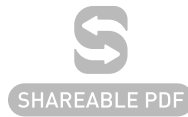

# Risk factors for mortality in patients with COVID-19 needing extracorporeal respiratory support

Jordi Riera <sup>1,2,3</sup>, Sara Alcántara <sup>4</sup>, Camilo Bonilla<sup>1,2</sup>, Phillip Fortuna<sup>5</sup>, Aaron Blandino Ortiz <sup>6</sup>, Ana Vaz<sup>7</sup>, Carlos Albacete<sup>8</sup>, Pablo Millán<sup>9</sup>, Pilar Ricart<sup>10</sup>, María Victoria Boado<sup>11</sup>, Pablo Ruiz de Gopegui<sup>12</sup>, Patricia Santa Teresa<sup>13</sup>, Elena Sandoval<sup>14</sup>, Helena Pérez-Chomón<sup>15</sup>, Alfredo González-Pérez<sup>16</sup>, Jorge Duerto<sup>17</sup>, Ricardo Gimeno<sup>18</sup>, Joaquín Colomina<sup>19</sup>, Vanesa Gómez<sup>20</sup>, Gloria Renedo<sup>21</sup>, José Naranjo<sup>22</sup>, Manuel Alfonso García<sup>23</sup>, Emilio Rodríguez-Ruiz<sup>24</sup>, Pedro Eduardo Silva <sup>5</sup>, Daniel Pérez<sup>8</sup>, Javier Veganzones<sup>25</sup>, Roberto Voces<sup>26</sup>, Sergi Martínez<sup>10</sup>, Pablo Blanco-Schweizer<sup>27</sup>, Marta García<sup>27</sup>, Héctor Villanueva-Fernández<sup>4</sup>, María Paz Fuset<sup>28</sup>, Stephani María Luna<sup>28</sup>, María Martínez-Martínez<sup>1,2</sup>, Eduard Argudo <sup>1,2</sup>, Luis Chiscano<sup>1,2</sup> and Roberto Roncon-Albuquerque Jr<sup>7</sup>

<sup>1</sup>Dept of Intensive Care, Hospital Universitari Vall d'Hebron, Barcelona, Spain. <sup>2</sup>SODIR, Vall d'Hebron Institut de Recerca, Barcelona, Spain. <sup>3</sup>CIBERES, CIBERESUCICOVID, Instituto de Salud Carlos III, Madrid, Spain. <sup>4</sup>Dept of Intensive Care, Hospital Universitario Puerta de Hierro, Majadahonda, Spain. <sup>5</sup>Medical Emergency Unit, Centro Hospitalar Universitário de Lisboa Central, Lisbon, Portugal. <sup>6</sup>Dept of Intensive Care, Hospital Universitario Ramón y Cajal, Madrid, Spain. <sup>7</sup>Dept of Intensive Care, São João University Hospital Center, Porto, Portugal. <sup>8</sup>Dept of Intensive Care, Hospital Universitario Virgen de la Arrixaca, Murcia, Spain. <sup>9</sup>Dept of Intensive Care, Hospital Universitario La Paz, Madrid, Spain. <sup>10</sup>Dept of Intensive Care, Hospital Universitari Germans-Trias i Pujol, Badalona, Spain. <sup>11</sup>Dept of Intensive Care, Hospital Universitario Cruces, Barakaldo, Spain. <sup>12</sup>Dept of Intensive Care, Hospital Universitario Miguel Servet, Zaragoza, Spain. <sup>13</sup>Dept of Intensive Care, Hospital Universitario Gregorio Marañón, Madrid, Spain. <sup>14</sup>Dept of Cardiac Surgery, Hospital Universitari Clínic, Barcelona, Spain. <sup>15</sup>Dept of Intensive Care, Hospital Universitario Virgen de la Macarena, Sevilla, Spain. <sup>16</sup>Dept of Intensive Care, Hospital Universitario Central de Asturias, Oviedo, Spain. <sup>17</sup>Dept of Intensive Care, Hospital Clínico San Carlos, Madrid, Spain. <sup>18</sup>Dept of Intensive Care, Hospital Universitari i Politècnic La Fe, València, Spain. <sup>19</sup>Dept of Intensive Care, Hospital Universitari Son Espases, Palma de Mallorca, Spain. <sup>20</sup>Dept of Intensive Care, Hospital Álvaro Cunqueiro, Vigo, Spain. <sup>21</sup>Dept of Intensive Care, Hospital Clínico Universitario, Valladolid, Spain. <sup>22</sup>Dept of Intensive Care, Hospital Universitario Reina Sofía, Córdoba, Spain. <sup>23</sup>Dept of Intensive Care, Hospital Universitario del Vinalopó, Elx, Spain. <sup>24</sup>Dept of Intensive Care, Hospital Clínico Universitario de Santiago de Compostela, Santiago de Compostela, Spain. <sup>25</sup>Dept of Anesthesiology, Hospital Universitario La Paz, Madrid, Spain. <sup>26</sup>Dept of Cardiac Surgery, Hospital Universitario Cruces, Barakaldo, Spain. <sup>27</sup>Dept of Intensive Care, Hospital Universitario Río Hortega, Valladolid, Spain. <sup>28</sup>Dept of Intensive Care, Hospital Universitari Bellvitge, Barcelona, Spain.

Corresponding author: Jordi Riera ([jorriera@vhebron.net](mailto:jorriera@vhebron.net))

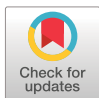

Shareable abstract (@ERSpublications)

**When indicating ECMO in patients with COVID-19, centre case volume, age, driving pressure and the duration of symptoms (not the length of MV) should be taken into account. Large drainage cannula and high PEEP levels during the first days are recommended.** <https://bit.ly/3DGjGkk>

**Cite this article as:** Riera J, Alcántara S, Bonilla C, *et al.* Risk factors for mortality in patients with COVID-19 needing extracorporeal respiratory support. *Eur Respir J* 2022; 59: 2102463 [DOI: 10.1183/13993003.02463-2021].

This single-page version can be shared freely online.

Copyright ©The authors 2022

This version is distributed under the terms of the Creative Commons Attribution Non-Commercial Licence 4.0. For commercial reproduction rights and permissions contact [permissions@ersnet.org](mailto:permissions@ersnet.org)

This article has an editorial commentary:

*To the Editor:*

Series describing the evolution of patients with severe acute respiratory distress syndrome (ARDS) secondary to coronavirus disease 2019 (COVID-19) and supported with extracorporeal membrane oxygenation (ECMO) during the first wave of the pandemic have reported mortalities ranging from 30% to 60% [1, 2]. More recent publications have demonstrated a trend towards a higher mortality in COVID-19 patients receiving support in later periods of the pandemic, even though the overall mortality of the disease seems lower [3, 4]. The reasons for this difference are not clear.
